# Supplementary material for: Oxidation of P700 Induces Alternative Electron Flow in Photosystem I in Wheat Leaves
Source: PubMed Central journal article supplement (PMC6631986; doi:10.3390/plants8060152), 2019-06-05
Supplement: plants-08-00152-s001.pdf [file plants-08-00152-s001.pdf]

## Supplementary Figures

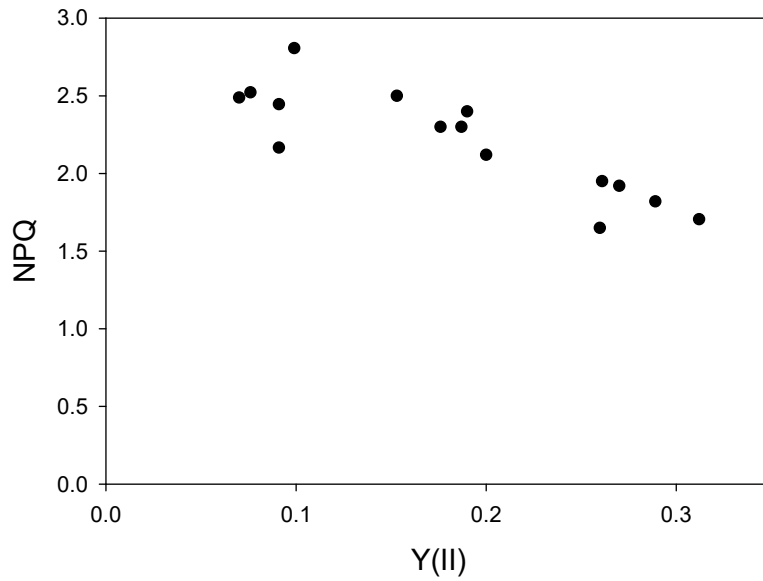

**Figure S1.** The relationship between the non-photochemical quenching of chlorophyll fluorescence (NPQ) and the apparent quantum yield of PSII (Y(II)) in wheat leaves. Both NPQ and Y(II) were measured simultaneously. Data points represent the averages of five plants. A reduction in  $p\text{CO}_2$  lowered Y(II). Steady states for measurements at various  $p\text{CO}_2$  were confirmed by the achievement of stable Y(II).

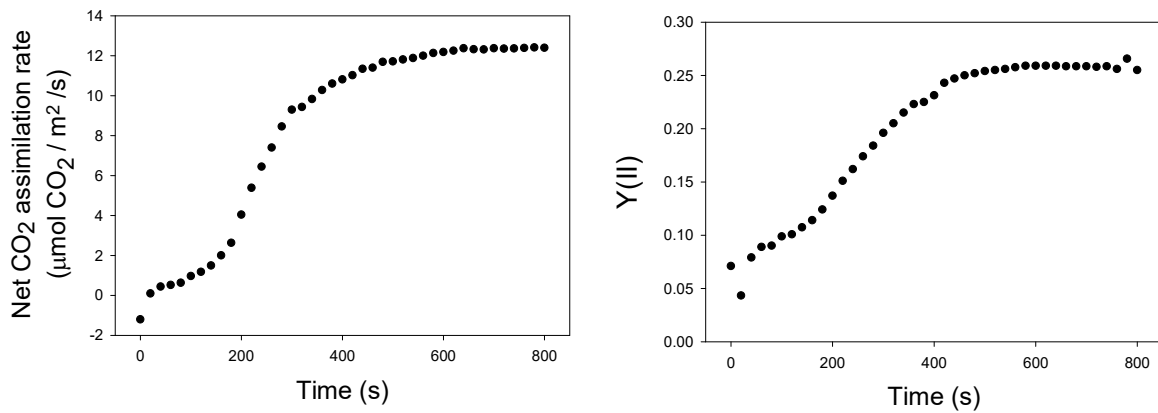

**Figure S2.** The responses of the net CO<sub>2</sub> assimilation rate and Y(II) to illumination by actinic light in wheat leaves. The net CO<sub>2</sub> assimilation rate (left panel) and Y(II) (right panel) were measured simultaneously at 25 °C leaf temperature, 40 Pa  $p\text{CO}_2$ , 21 kPa  $p\text{O}_2$ , and 1000  $\mu\text{mol photons}^{-1} \text{m}^{-2} \text{s}^{-1}$  light intensity. The actinic light was turned on at 0 s.
